# Supplementary material for: The Health Effects of 14 Weeks of Physical Activity in a Real-Life Setting for Adults with Intellectual Disabilities
Source: Transl Sports Med. 2022 Dec 1;2022:6817318. doi: 10.1155/2022/6817318 (PMC11022770; doi:10.1155/2022/6817318)
Supplement: Supplementary Materials — Appendix 1 Participants, characteristics, and distribution on the different outcomes. Supplementary Materials. [file 6817318.f1.xlsx]

## Sheet: Ark1
Appendix 1
Participants, charachteristics and distribution on the different outcomes.
	Numbers of measurements
Tests	PA		1st		2nd		Control
	PRE	POST	PRE	POST	PRE	POST	PRE	POST
DXA scans	76	73	31	30	45	43	18	15
HR (3.2 km/t)	70	72	26	30	44	42	17	13
HR (4.8 km/t)	64	62	23	22	41	40	15	12
Accelerometry	43	-	21	-	22	-	-	-
	Age (years ± SD)
	PA		1st		2nd		Control
	PRE	POST	PRE	POST	PRE	POST	PRE	POST
DXA scans	26.7±8.3	26.8±8.0	26.8±9.0	27.0±9.2	26.7±8.0	26.4±7.1	28.9±5.8	29.7±6.2
HR (3.2 km/t)	26.7±7.8	26.5±8.0	26.7±7.6	27.1±9.1	26.7±8.0	26.0±7.1	28.9±6.0	28.7±4.7
HR (4.8 km/t)	27.1±8.1	26.5±7.5	27.3±7.9	27.3 ±8.1	26.9±8.3	26.1±7.2	29.7±5.9	28.1±4.5
	Gender (f/m)
	PA		1st		2nd		Control
	PRE	POST	PRE	POST	PRE	POST	PRE	POST
DXA scans	42/34	40/33	16/15	15/15	26/19	25/18	6/12	6/9
HR (3.2 km/t)	38/32	38/34	13/13	15/15	25/19	23/19	5/12	4/9
HR (4.8 km/t)	34/30	31/31	11/12	9/13	23/18	22/18	3/12	4/8
